# Supplementary material for: Minimizing the evidence-practice gap – a prospective cohort study incorporating balance training into pulmonary rehabilitation for individuals with chronic obstructive pulmonary disease
Source: Springer Nature journal article supplement (doi:10.1186/s12890-015-0067-2), 2015-07-22
Supplement: MOESM1 [file 9751838]

**Additional file 1: Table outlining the KT actions and subsequent effect**

|               | <b>Knowledge Translation action</b>                                                                                                                 | <b>Knowledge Translation effect</b>                                   |
|---------------|-----------------------------------------------------------------------------------------------------------------------------------------------------|-----------------------------------------------------------------------|
| <b>Step 1</b> | One hour training session regarding the benefits and practical applications of balance training and familiarization with the balance equipment      | Increased knowledge and awareness of the benefits of balance training |
| <b>Step 2</b> | Assistance with the balance training sessions delivering guidance on; prescription, progression and providing practical demonstrations as requested | Increased trust and rapport with the health care professionals        |
| <b>Step 3</b> | Program development, led by the health care professionals responsible for delivering pulmonary rehabilitation                                       | Increased feelings of ownership and likelihood of sustainability      |
| <b>Step 4</b> | Development of program logs, led by the health care professionals responsible for delivering pulmonary rehabilitation                               | Increased feelings of ownership and likelihood of sustainability      |
| <b>Step 5</b> | Brief BEST tests results pre and post pulmonary rehabilitation are provided on a one-to-one basis.                                                  | Reflection on performance and enhanced motivation                     |
